# Supplementary material for: Patients with genetically heterogeneous synchronous colorectal cancer carry rare damaging germline mutations in immune-related genes
Source: PubMed Central journal article supplement (PMC4935966; doi:10.1038/ncomms12072), 2016-07-05
Supplement: ncomms12072-s1.pdf [file ncomms12072-s1.pdf]

**Supplementary Figure 1.** Estimation of tumour content

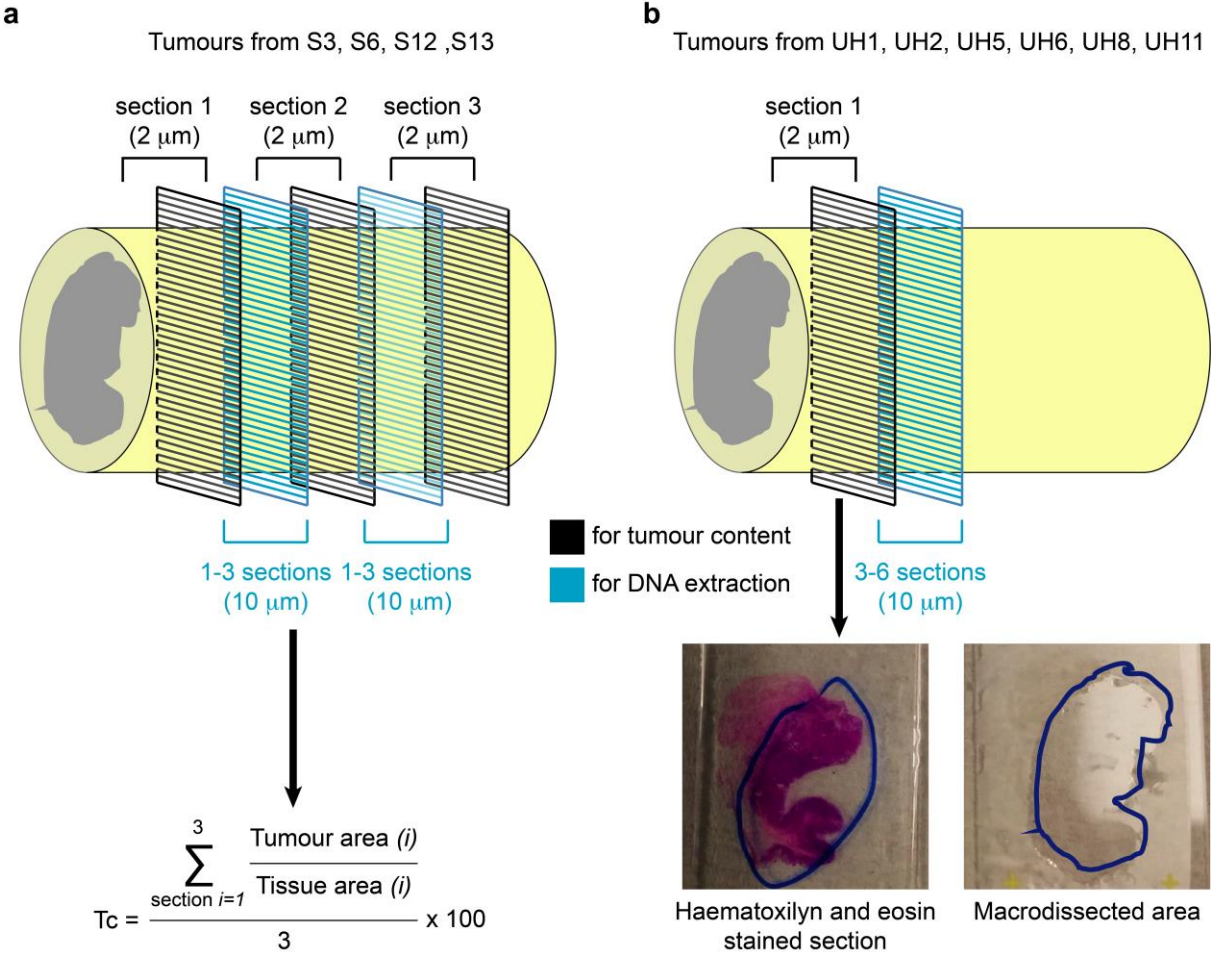

**a,** Approach used to estimate the tumour content in S13T1/T2, S6T1/T2, S3T1/T2 and S12T1/T2. Tissue and tumour areas were evaluated by two independent pathologist on three 2 µm-thick sections at the beginning, in the middle and at the end of the tissue block. The tumour content of these sections was calculated as the percentage of tumour area over the total tissue area.

**b,** Approach used to estimate the tumour content in UH1T1/T2, UH2T1/T2, UH5T1/T2, UH6T1/T2, UH8T1/T2 and UH11T1/T2. Two µm-thick FFPE section at the beginning of the block was stained for haematoxylin and eosin and the tumour area was delimited by pathologist. This was used as a reference to macrodissect the tumour.

**Supplementary Figure 2. Sequencing throughput**

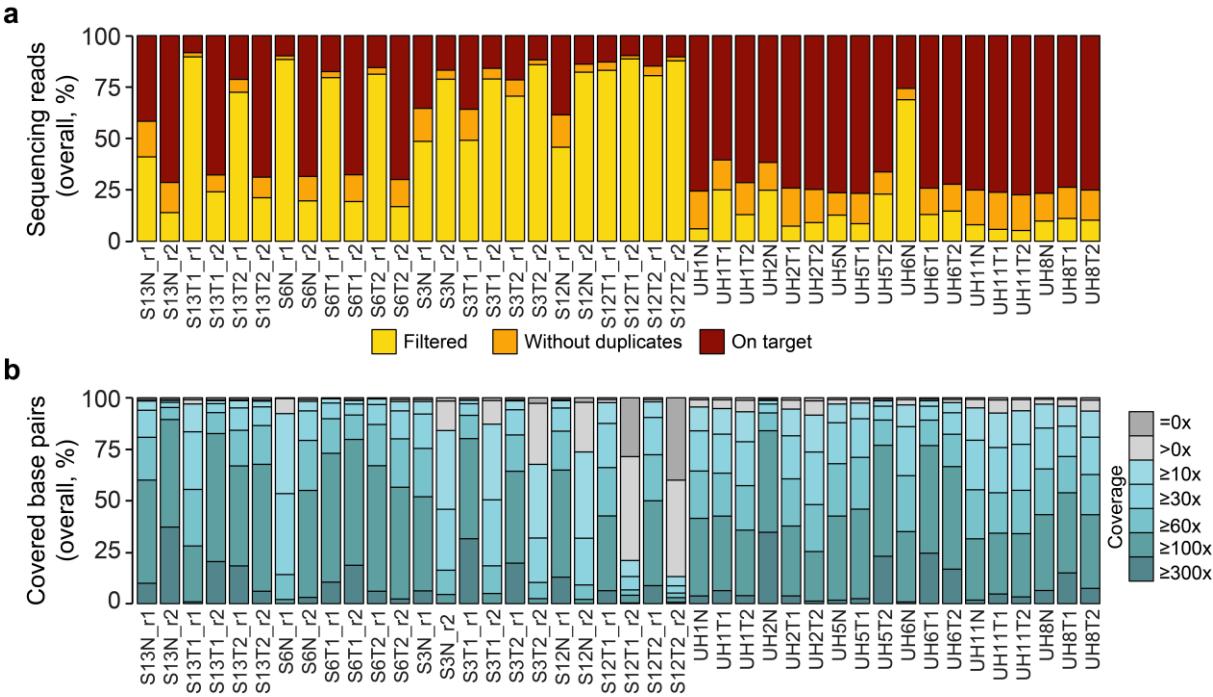

**a**, Percentage of reads retained at each filtering steps over the total number of aligned sequencing reads. Two distinct exome sequencing rounds (r1 and r2) were performed for both tumours of patients S13, S6, S3 and S12.

**b**, Percentage of targeted base pairs that were sequenced at different depth of coverage.

**Supplementary Figure 3.** Variant calling pipelines

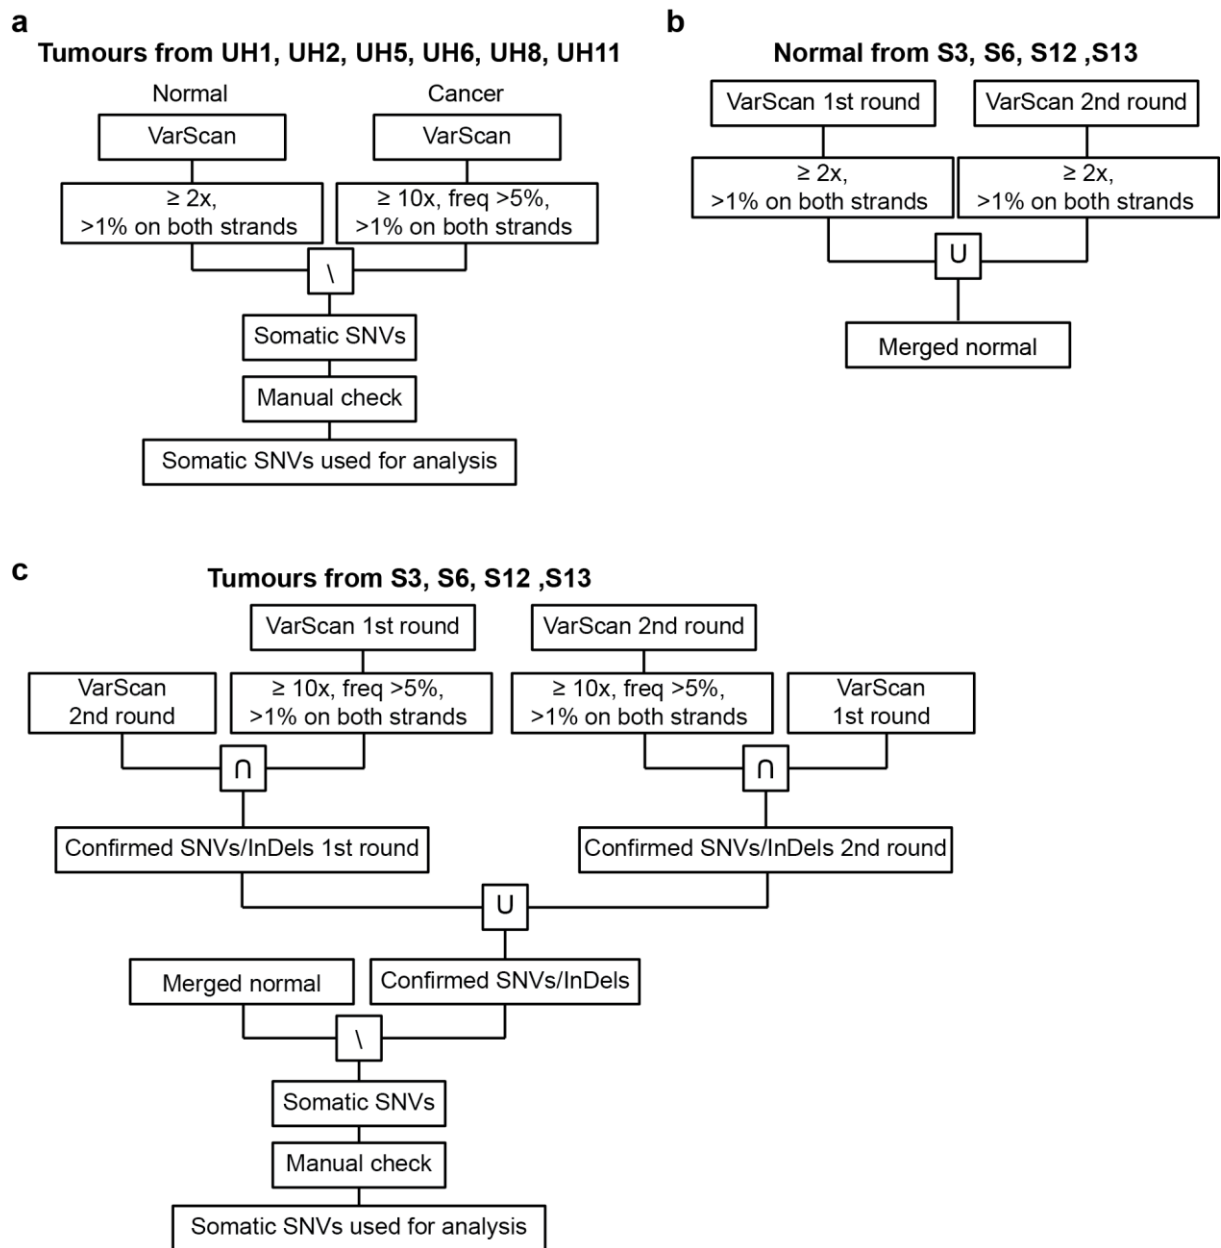

**a**, Identification of somatic mutations in tumours of patients UH1, UH2, UH5, UH6, UH8 and UH11. Mutations were called and filtered based on quality metrics on tumour and matched normal independently. Somatic mutations were then identified as tumour-specific mutations and all manually inspected.

**b**, Identification of germline mutations in normal samples of patients S13, S6, S3, and S12 that underwent two rounds of whole exome sequencing. Mutations were first called and filtered for quality in each sequencing round and then merged into a single set.

c, Identification of somatic mutations in tumours of patients S13, S6, S3, and S12 that underwent two rounds of whole exome sequencing. Mutations were called and filtered for quality in each experiment independently and retained only if found in the other sequencing round. The two confirmed sets were merged, somatic mutations were identified as tumour-specific mutations and manually inspected.

**Supplementary Figure 4.** Signatures of somatic and germline mutations

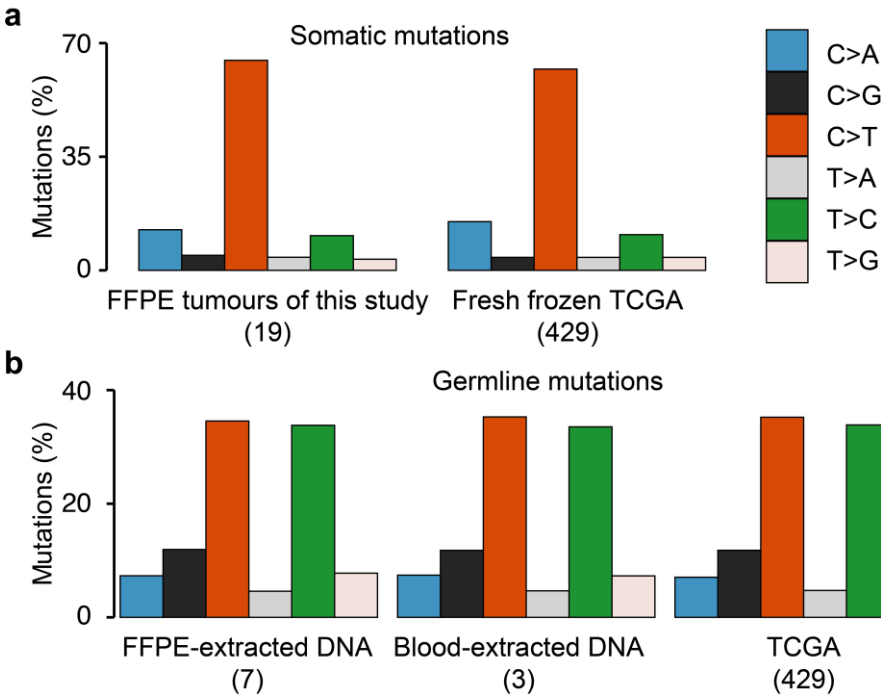

**a,** Average percentage of base substitutions in FFPE tumours sequenced in this study and fresh frozen colorectal cancers collected from TCGA. The mutational signature is the most prevalent in CRC<sup>1</sup>.

**b,** Average percentage of base substitutions in normal DNA from FFPE blocks, from blood sequenced in this study and from TCGA samples. The mutational signature is in agreement with previous report<sup>2</sup>.

**Supplementary Figure 5.** Coverage of mutated sites in paired lesions

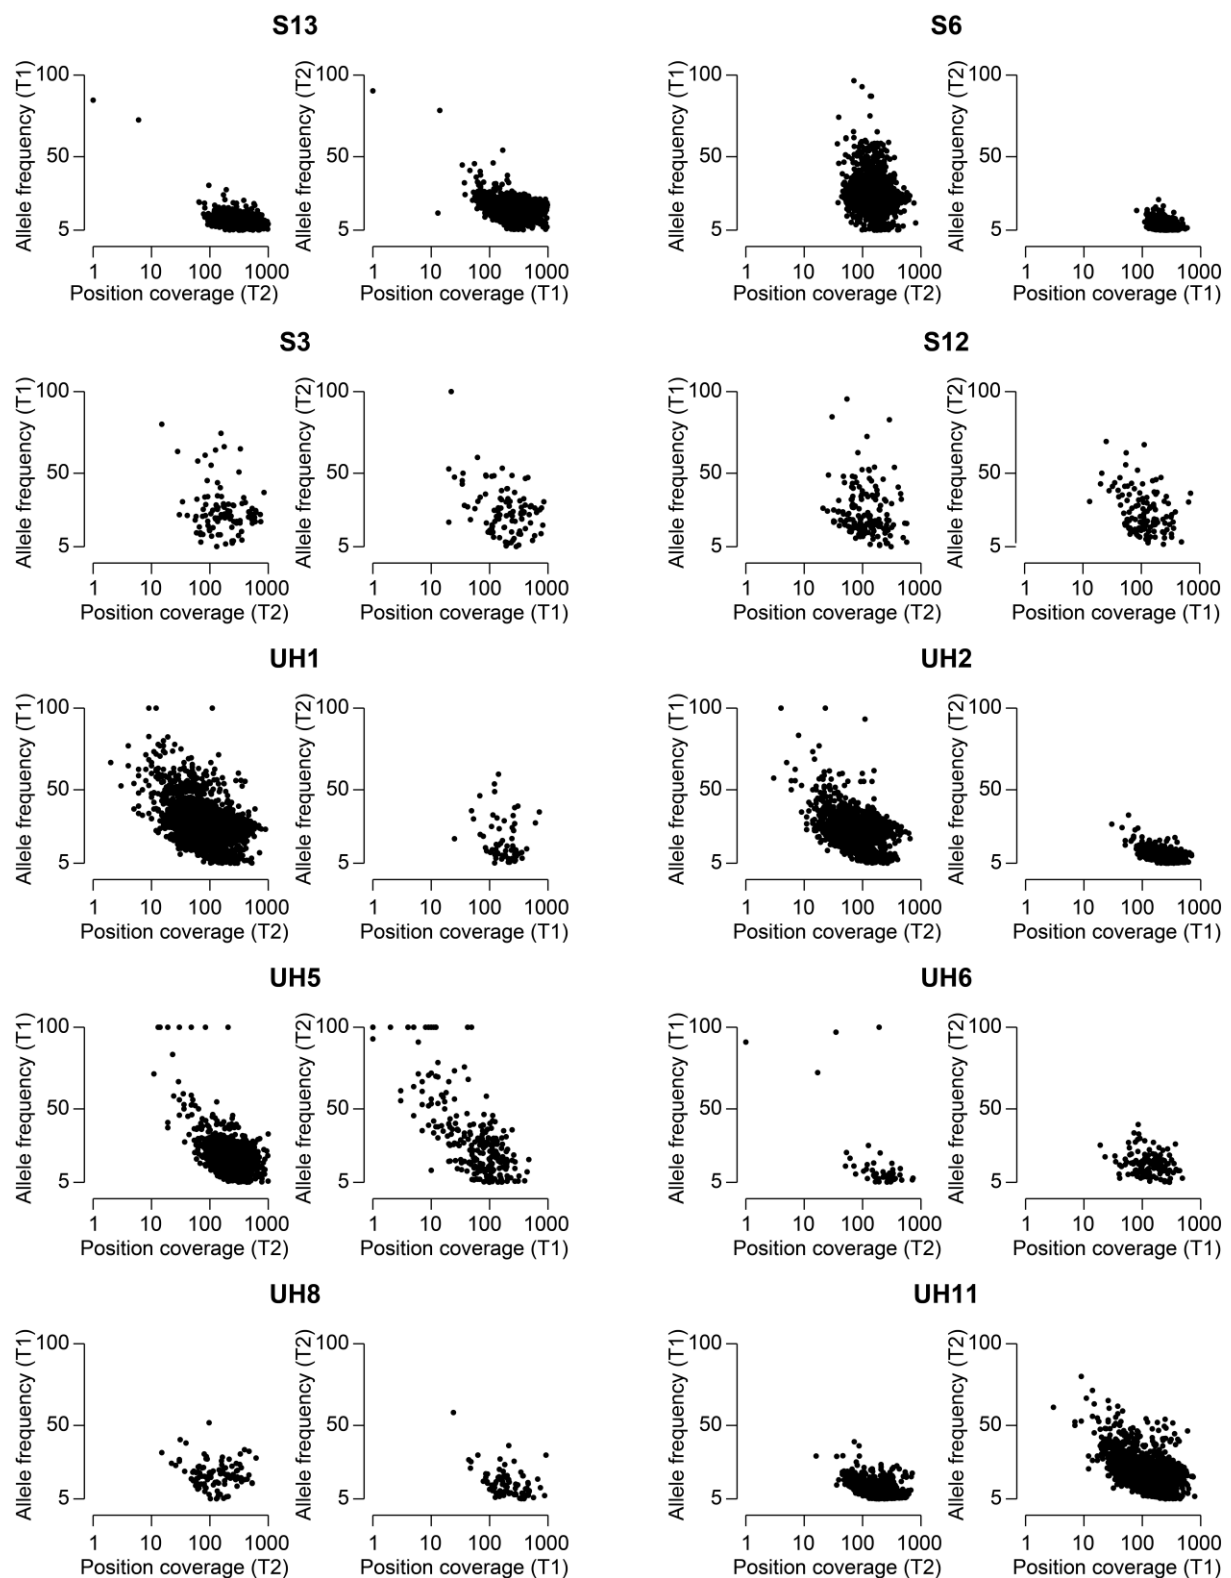

For each patient, reported are the allele frequency of somatic mutations in one tumour and the depth of coverage of the corresponding position in the other tumour.

**Supplementary Figure 6.** Altered cancer genes in lesions of patients S3, S12, UH5

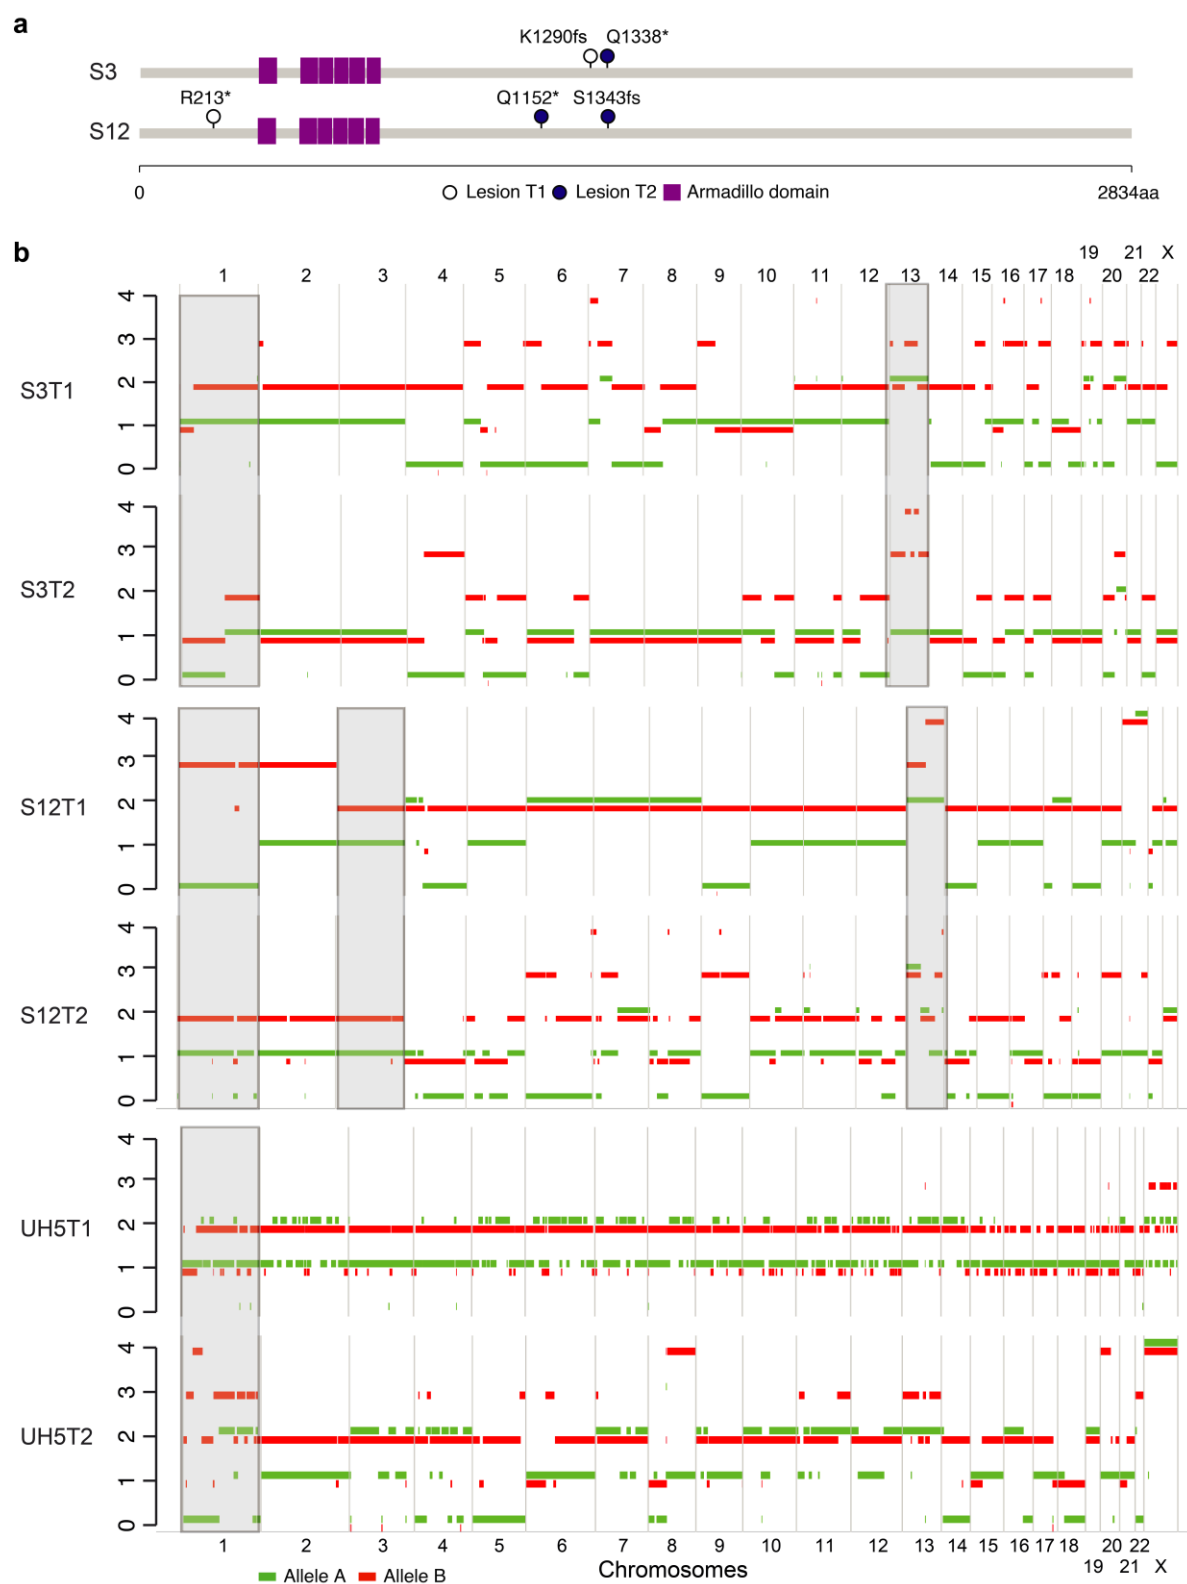

**a**, Mutations in APC found in tumours of patients S3 and S12. Mutations are indicated according to the Human Genome Variation Society (<http://www.hgvs.org/mutnomen>).

**b**, Allele-specific copy number of all assayed loci in tumours of patients S3, S12 and UH5.

Alleles with highest copy number (A) and with lowest copy number (B) are shown.

Highlighted are chromosomes with shared cancer genes between paired lesions of a patient.



**Supplementary Figure 7.** Allele frequency in whole exome and deep sequencing

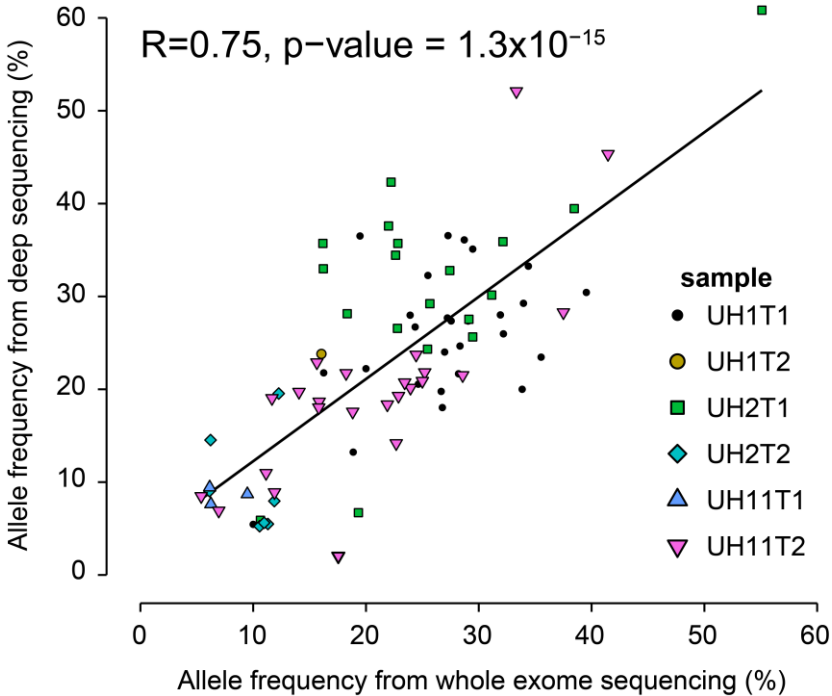

Allele frequencies of somatic mutations in 151 cancer genes in tumours of patients UH1, UH2 and UH11 as detected by whole exome and deep sequencing. Pearson’s correlation coefficient (R) and the corresponding p-value are reported.

**Supplementary Figure 8. Clone composition of syCRCs**

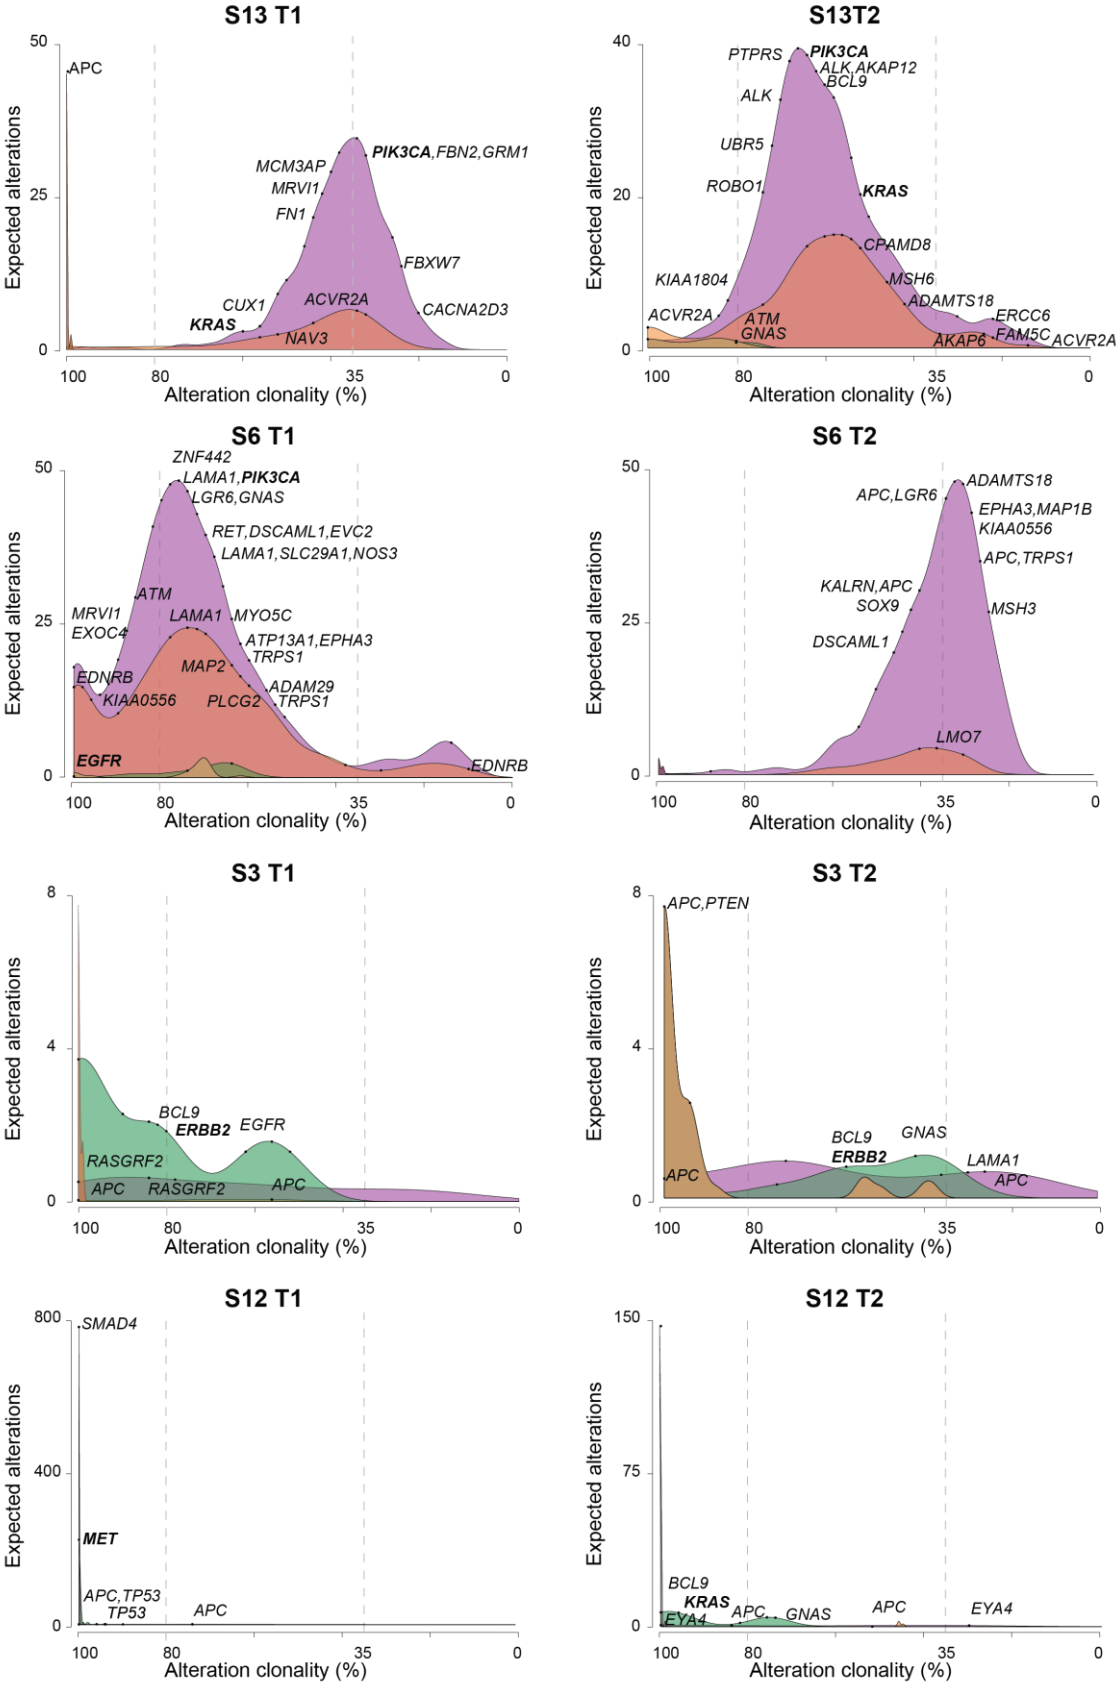

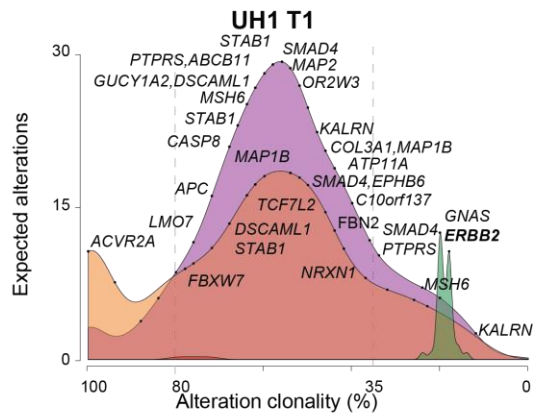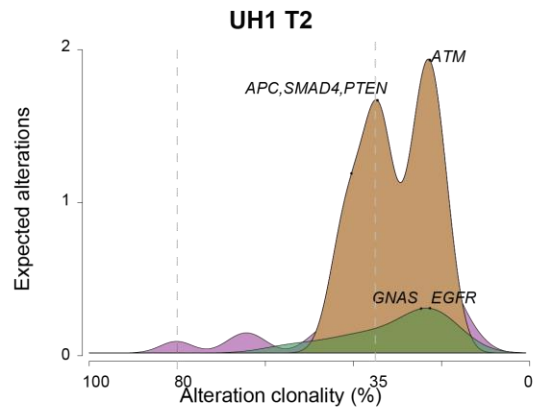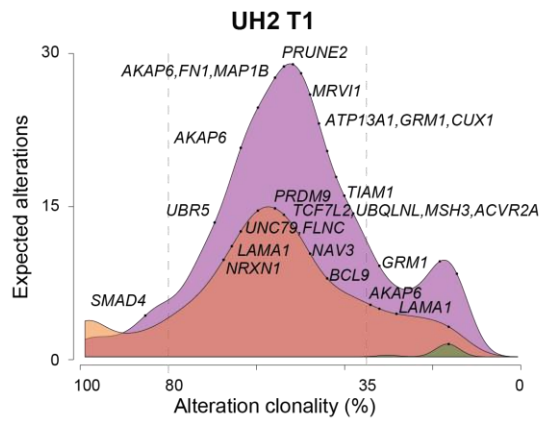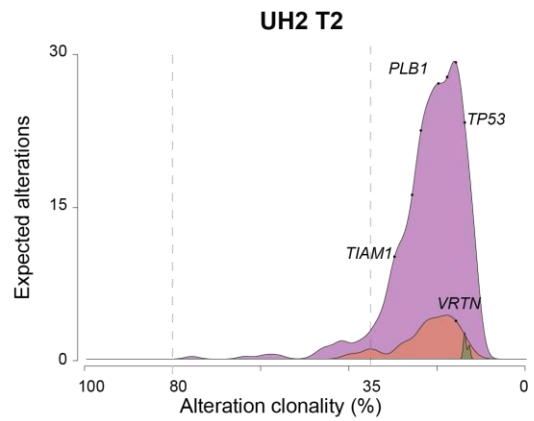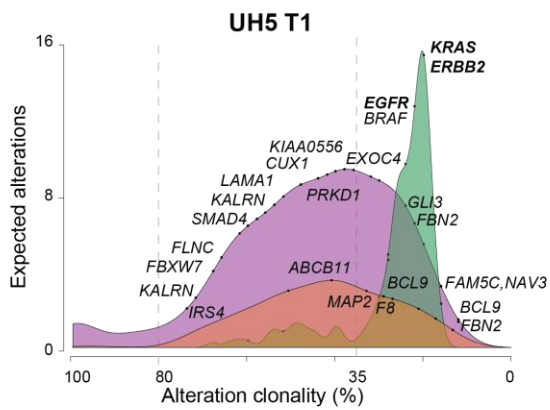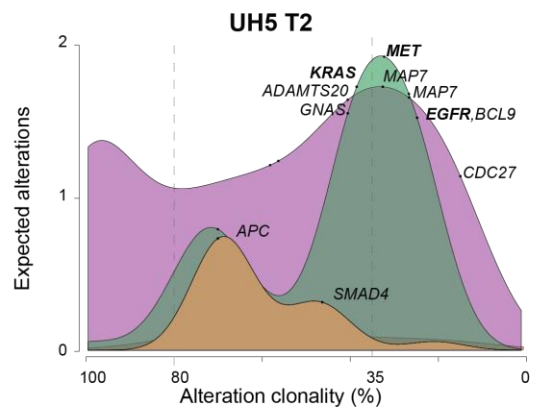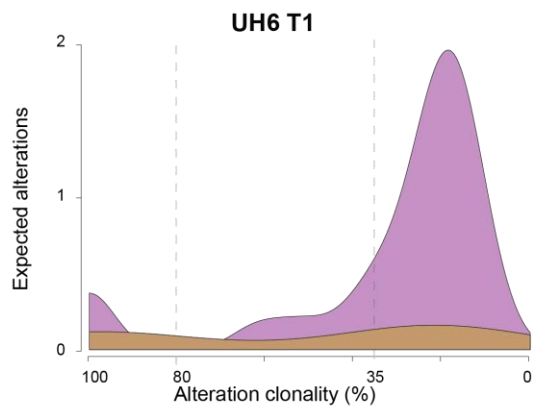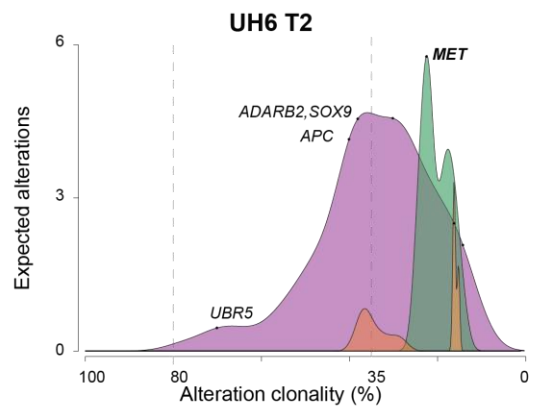

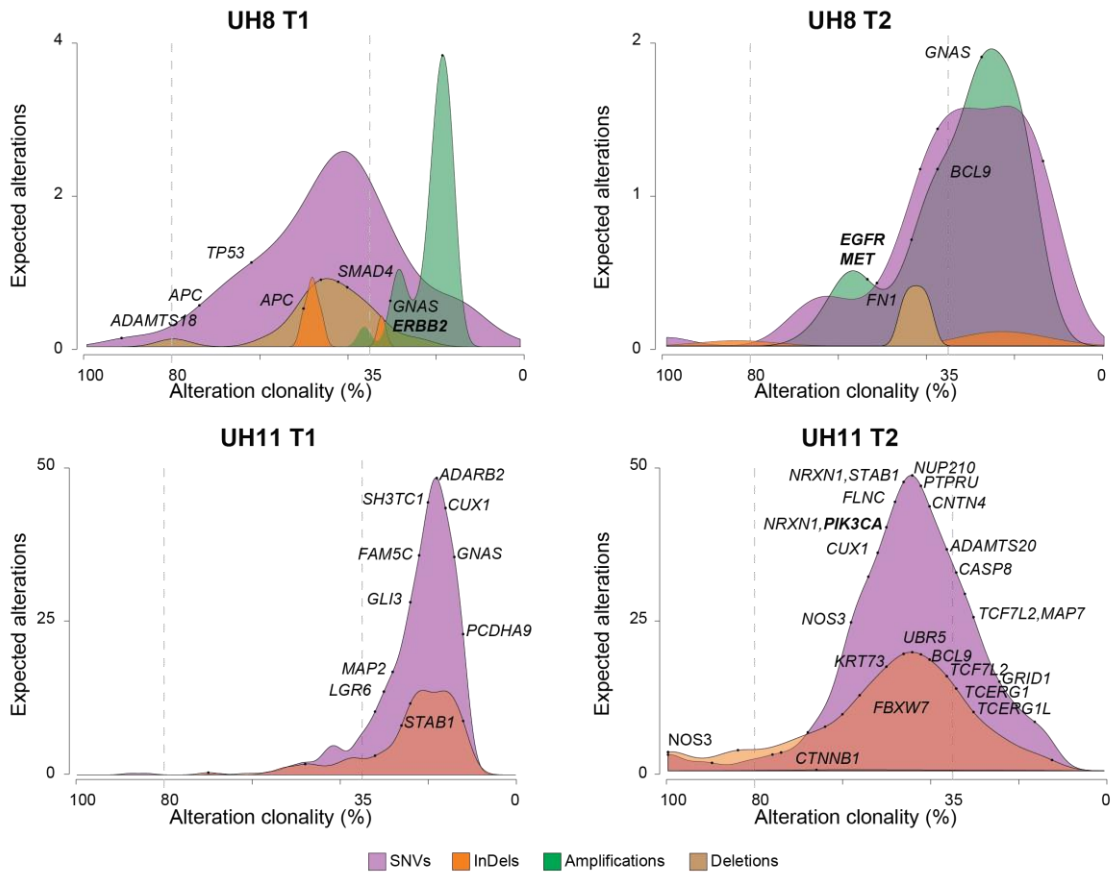

For each lesion of all patients, the density distribution of clonality for each type of alteration (SNVs, InDels, amplifications and deletions) is reported. Dots represent driver alterations in known colorectal cancer genes.

**Supplementary Figure 9.** Clone composition estimated with our method and with CCF

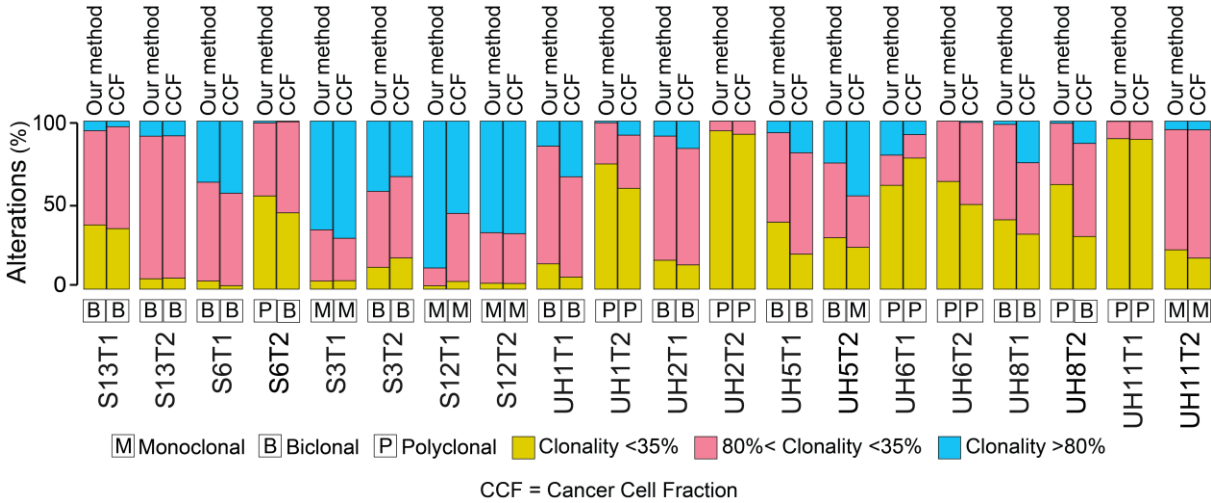

In each tumour, alteration clonality was measured with our method and considering the Cancer Cell Fraction (CCF)<sup>3</sup>. From these measures the corresponding clone composition was derived. To apply CCF, we first estimated the cancer cell fraction of all somatic mutations in each tumour and then used these measures to calculate the clone composition. In 17 out of 20 tumours, we find highly comparable clonality estimations resulting in identical clone composition. In three cases (S6T2, UH5T2 and UH8T2) our method detected slightly higher fractions of subclonal mutations. This is likely due to the fact that we also account for the clonality of copy number variant regions, which are instead excluded in CCF.

**Supplementary Figure 10.** Alteration clonality of actionable genes in syCRCs

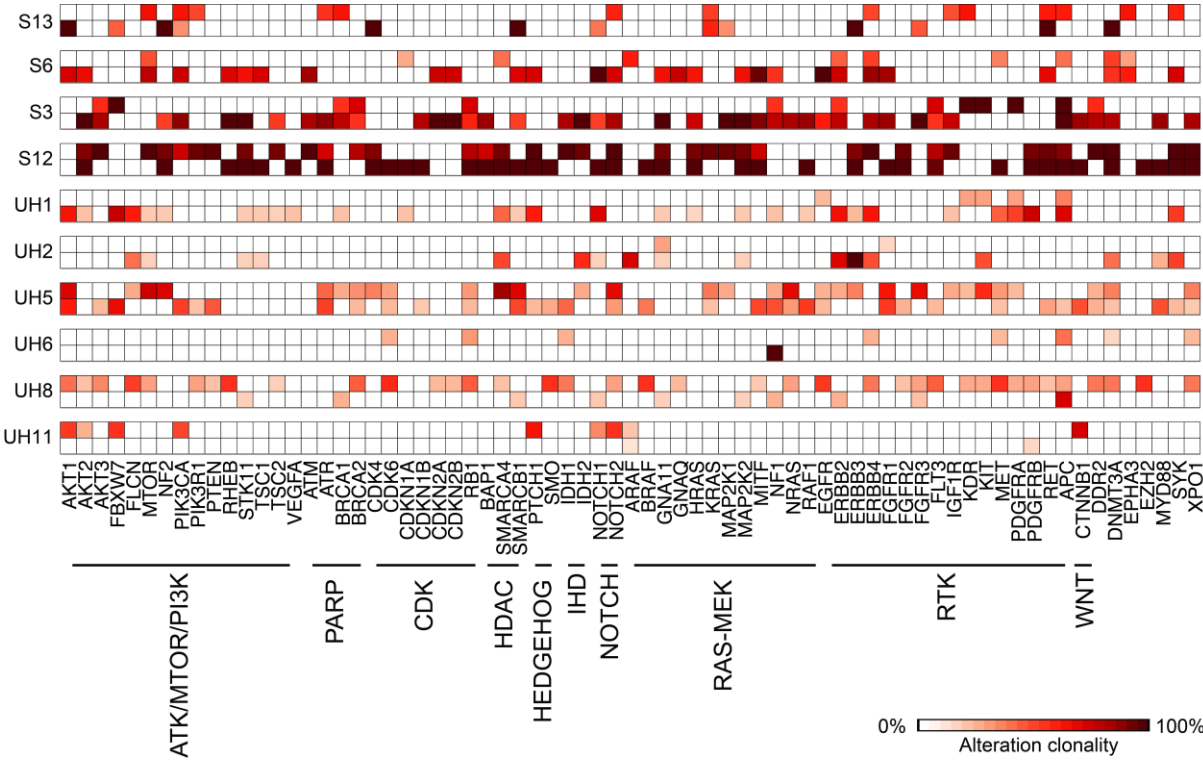

Clonality of alterations in actionable genes relevant in cancer therapy (see main text). Genes are grouped according to pathways. Tumours of patients S12 and S3 showed several clonal CNVs in chromosomes 1 and 3 (Supplementary Fig. 6).

**Supplementary Figure 11. Clinical features of syCRC and soCRC patients**

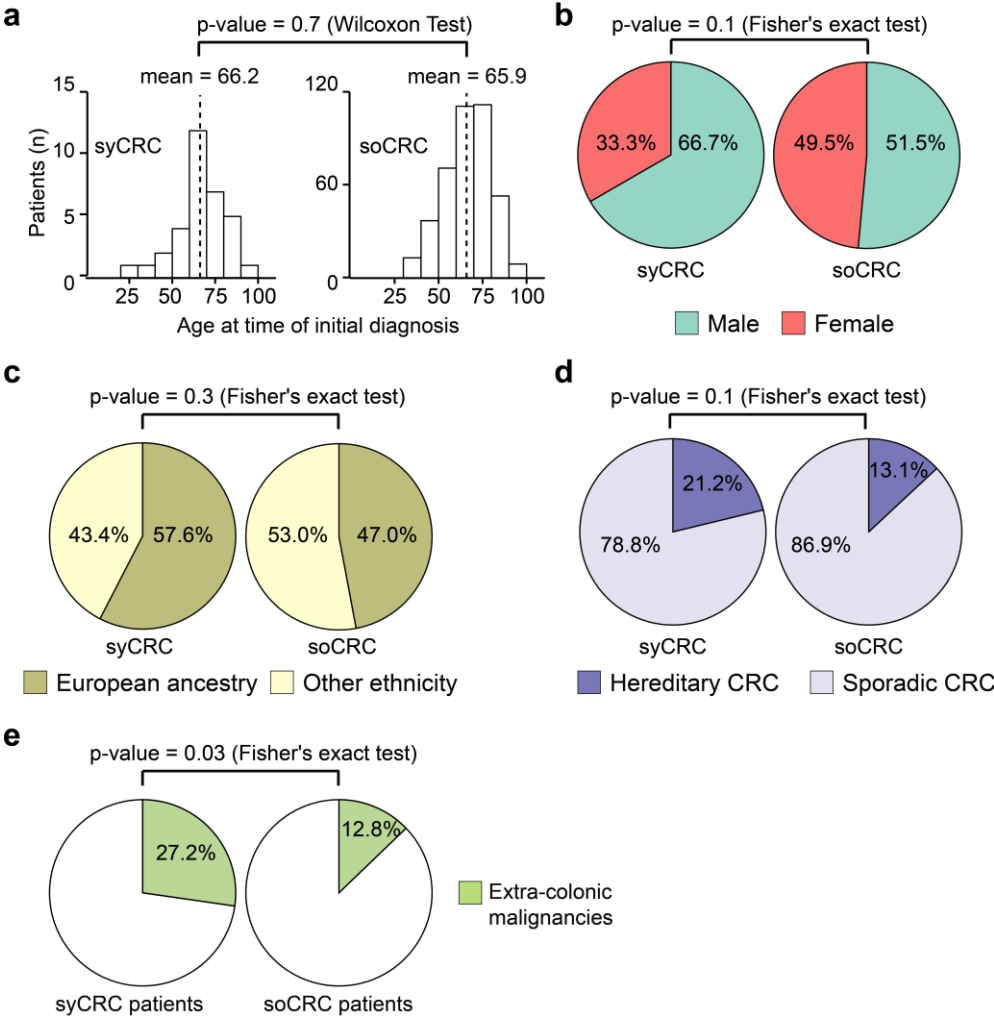

**a**, Distributions of age at initial diagnosis of syCRC (33) and soCRC (406) patients.

**b-e** Composition of syCRC (33) and soCRC (406) cohorts in terms of gender, ethnicity, type of colorectal cancer, and presence of extra-colonic malignancies.

**Supplementary Figure 12.** Neutrophils and lymphocytes in syCRCs and soCRCs

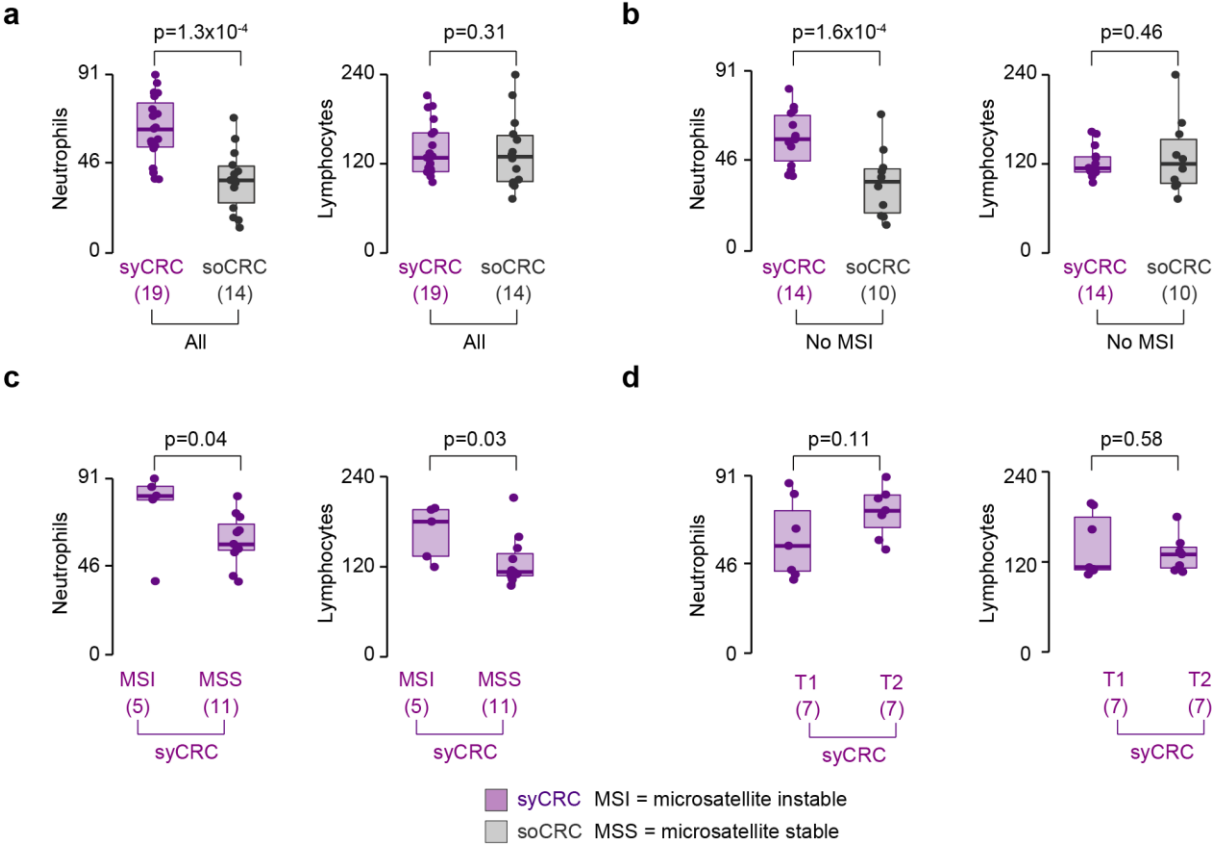

Comparison of neutrophils and lymphocyte between syCRCs and soCRCs overall (a) and considering MSI and MSS samples separately (b). Comparison of neutrophils and lymphocyte between MSI and MSS (c) and T1 and T2 (d) syCRCs. Distributions were compared using one-tailed Wilcoxon rank-sum test. Boxes represent to the 25th and 75th percentiles of each distribution, and the horizontal bars correspond to the median value. Whiskers indicate the values observed within up to 1.5 times the interquartile range above and below each box.



### Supplementary Figure 13. Permutation tests on gene expression

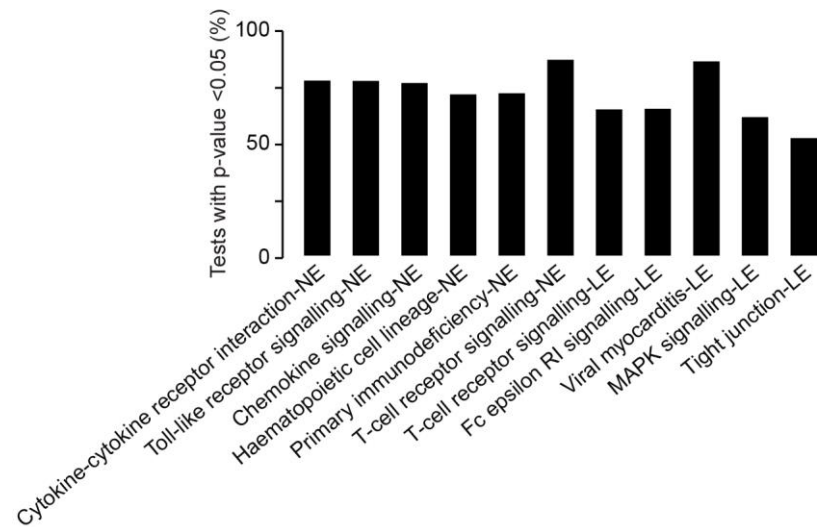

Percentage of statistically significant comparisons between 14 syCRCs and 14 randomly extracted soCRCs (Fisher's exact test). Only results for the KEGG gene sets that were enriched in not expressed and lowly expressed genes are shown. NE = not expressed; LE = lowly expressed.

**Supplementary Figure 14.** Expression levels of genes with rare damaging SNPs

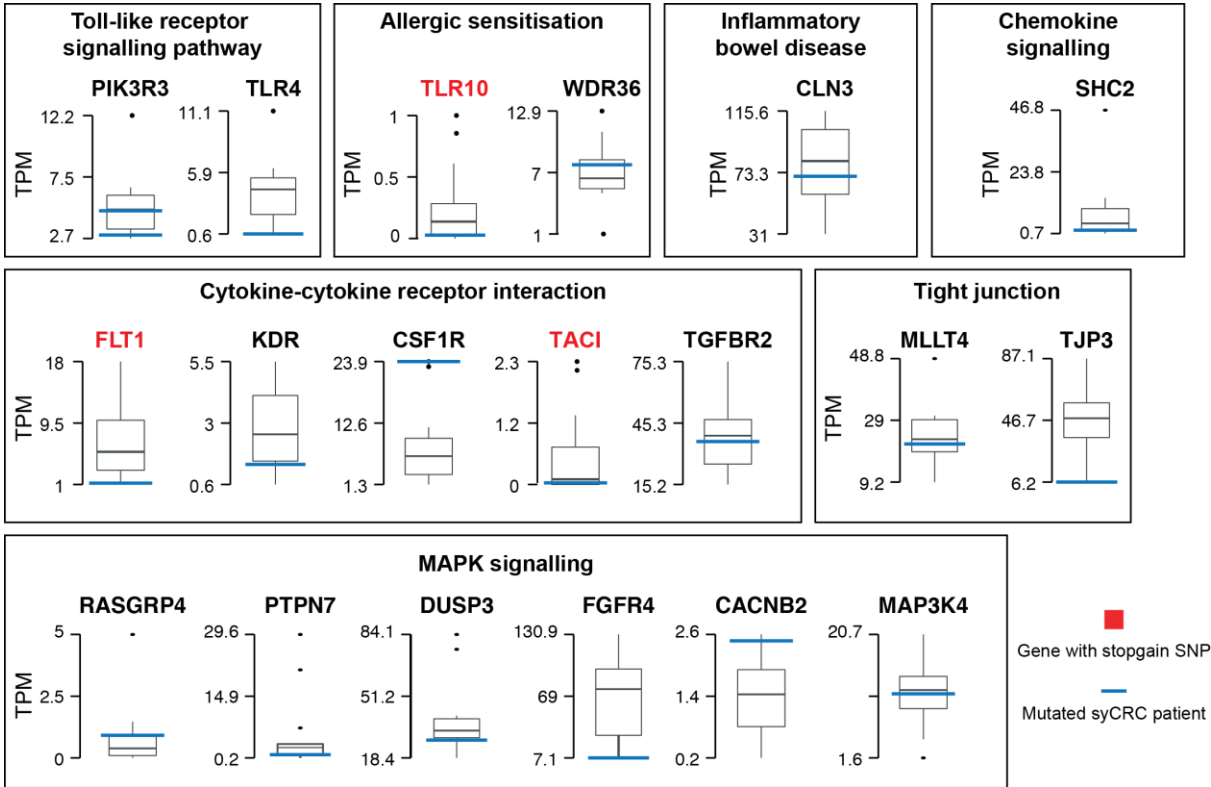

Distribution of expression values (Transcripts per Million, TPM) of mutated and wild-type genes in the pathways enriched in Fig. 3c and Fig. 4h in TCGA syCRCs.

**Supplementary Table 1.** Clinical information of 20 syCRCs sequenced in the study

| Patient ID | Other malignancies | Lesion | Source       | Anatomical site  | Tumour Stage | Size (cm) | Tumour Content (%) | Microsatellite instability            |          | MMR immune histochemistry |
|------------|--------------------|--------|--------------|------------------|--------------|-----------|--------------------|---------------------------------------|----------|---------------------------|
|            |                    |        |              |                  |              |           |                    | Markers                               | Unstable |                           |
| S13        | Papillar Carcinoma | T1     | FFPE         | Ascending Colon  | T3           | 4         | 49                 | BAT-26, BAT-25, NR-21, NR-24, MONO-27 | 5        | Loss of MLH1              |
|            |                    | T2     | FFPE         | Ascending Colon  | T3           | 2.6       | 60                 | BAT-26, BAT-25, NR-21, NR-24, MONO-27 | 5        | Loss of MLH1              |
| S6         | -                  | T1     | FFPE         | Ascending Colon  | T3           | 4         | 66                 | BAT-26, BAT-25, NR-21, NR-24, MONO-27 | 5        | Loss of MSH2              |
|            |                    | T2     | FFPE         | Ascending Colon  | T3           | 3         | 41                 | BAT-26, BAT-25, NR-21, NR-24, MONO-27 | 5        | Loss of MSH2              |
| S3         | -                  | T1     | Fresh frozen | Rectum           | T3           | 3.4       | 70                 | BAT-26, BAT-25, NR-21, NR-24, MONO-27 | 0        | Not investigated          |
|            |                    | T2     | FFPE         | Descending Colon | T1           | 2.1       | 77                 | BAT-26, BAT-25, NR-21, NR-24, MONO-27 | 0        | Not investigated          |
| S12        | -                  | T1     | FFPE         | Descending Colon | T3           | 2.5       | 62                 | BAT-26, BAT-25, NR-21, NR-24, MONO-27 | 0        | Not investigated          |
|            |                    | T2     | FFPE         | Descending Colon | T2           | 4         | 54                 | BAT-26, BAT-25, NR-21, NR-24, MONO-27 | 0        | Not investigated          |
| UH1        | -                  | T1     | FFPE         | Caecum           | T3           | 8         | ≥90                | Not investigated                      |          | None detected             |
|            |                    | T2     | FFPE         | Ascending Colon  | T2           | 1.3       | ≥90                | Not investigated                      |          | None detected             |
| UH2        | Breast Cancer      | T1     | FFPE         | Ascending Colon  | T2           | 2.5       | ≥90                | Not investigated                      |          | None detected             |
|            |                    | T2     | FFPE         | Transverse Colon | T3           | 3.2       | ≥90                | Not investigated                      |          | None detected             |
| UH5        | -                  | T1     | FFPE         | Hepatic Flexure  | T2           | 2.2       | ≥90                | Not investigated                      |          | Loss of MLH1, PMS2        |
|            |                    | T2     | FFPE         | Rectum           | T2           | 2.3       | ≥90                | Not investigated                      |          | Loss of MLH1, PMS2        |
| UH6        | -                  | T1     | FFPE         | Rectum           | T3           | 5         | ≥90                | Not investigated                      |          | None detected             |
|            |                    | T2     | FFPE         | Rectum           | T3           | 4.5       | ≥90                | Not investigated                      |          | None detected             |
| UH8        | -                  | T1     | FFPE         | Descending Colon | T1           | 1.5       | ≥90                | Not investigated                      |          | None detected             |
|            |                    | T2     | FFPE         | Descending Colon | T1           | 2         | ≥90                | Not investigated                      |          | None detected             |
| UH11       | -                  | T1     | FFPE         | Caecum           | T2           | 3         | ≥90                | Not investigated                      |          | Loss of MLH1, PMS2        |
|            |                    | T2     | FFPE         | Transverse Colon | T3           | 2.5       | ≥90                | Not investigated                      |          | Loss of MLH1, PMS2        |

For each patient, reported are other malignancies (if any), the preservation method of the tissue and pathological information on both lesions. MMR: mismatch repair proteins.

**Supplementary Table 2.** Sequencing statistics for whole exome sequencing in 20 tumour and 10 normal samples

| Patient ID | Sample Type | Sequencing round | Sequenced Gbp | Aligned Gbps | Gbps after removal of duplicates | On Target Gbps | Mean coverage overall (reads) | Mean coverage on cancer genes (reads) |
|------------|-------------|------------------|---------------|--------------|----------------------------------|----------------|-------------------------------|---------------------------------------|
| S13        | N           | 1                | 35.31         | 22.09        | 13.03                            | 7.78           | 152                           | 137                                   |
|            | T1          |                  | 57.23         | 55.62        | 5.76                             | 4.12           | 80                            | 243                                   |
|            | T2          |                  | 54.00         | 52.32        | 14.42                            | 9.95           | 194                           | 76                                    |
|            | N           | 2                | 23.47         | 22.67        | 19.52                            | 13.80          | 270                           | 221                                   |
|            | T1          |                  | 18.82         | 17.97        | 13.65                            | 10.77          | 210                           | 182                                   |
|            | T2          |                  | 13.25         | 12.62        | 9.95                             | 7.60           | 148                           | 153                                   |
| S6         | N           | 1                | 32.09         | 27.08        | 3.15                             | 1.84           | 36                            | 38                                    |
|            | T1          |                  | 63.73         | 60.69        | 12.41                            | 8.65           | 170                           | 129                                   |
|            | T2          |                  | 68.97         | 64.06        | 12.02                            | 7.57           | 148                           | 134                                   |
|            | N           | 2                | 11.74         | 10.58        | 8.50                             | 6.27           | 123                           | 210                                   |
|            | T1          |                  | 20.32         | 17.38        | 14.03                            | 10.31          | 201                           | 151                                   |
|            | T2          |                  | 12.09         | 10.20        | 8.49                             | 6.27           | 122                           | 128                                   |
| S3         | N           | 1                | 37.88         | 22.14        | 11.39                            | 6.59           | 129                           | 117                                   |
|            | T1          |                  | 46.16         | 44.54        | 22.69                            | 13.80          | 271                           | 37                                    |
|            | T2          |                  | 58.77         | 56.73        | 16.71                            | 10.30          | 202                           | 270                                   |
|            | N           | 2                | 14.65         | 12.50        | 2.65                             | 1.82           | 36                            | 24                                    |
|            | T1          |                  | 17.02         | 14.20        | 3.00                             | 1.95           | 38                            | 195                                   |
|            | T2          |                  | 14.61         | 12.98        | 1.83                             | 1.33           | 26                            | 26                                    |
| S12        | N           | 1                | 26.48         | 25.70        | 13.95                            | 8.62           | 168                           | 165                                   |
|            | T1          |                  | 54.79         | 52.74        | 8.91                             | 6.03           | 118                           | 28                                    |
|            | T2          |                  | 54.64         | 52.58        | 10.25                            | 6.96           | 136                           | 103                                   |
|            | N           | 2                | 13.16         | 11.30        | 2.01                             | 1.35           | 26                            | 22                                    |
|            | T1          |                  | 13.46         | 9.35         | 1.06                             | 0.79           | 15                            | 119                                   |
|            | T2          |                  | 9.83          | 6.90         | 0.85                             | 0.62           | 12                            | 20                                    |
| UH1        | N           | 1                | 8.78          | 8.28         | 7.78                             | 5.28           | 104                           | 106                                   |
|            | T1          |                  | 22.44         | 11.16        | 8.37                             | 5.75           | 113                           | 115                                   |
|            | T2          |                  | 8.53          | 8.00         | 6.97                             | 4.88           | 96                            | 98                                    |

|      |    |   |       |       |       |       |     |     |
|------|----|---|-------|-------|-------|-------|-----|-----|
| UH2  | N  | 1 | 27.45 | 26.00 | 19.55 | 13.34 | 261 | 277 |
|      | T1 |   | 22.97 | 8.04  | 7.46  | 5.03  | 99  | 100 |
|      | T2 |   | 6.17  | 5.83  | 5.30  | 3.75  | 74  | 75  |
| UH5  | N  | 1 | 8.28  | 7.89  | 6.89  | 5.11  | 100 | 109 |
|      | T1 |   | 8.89  | 8.55  | 7.82  | 5.48  | 107 | 117 |
|      | T2 |   | 23.09 | 19.22 | 14.82 | 10.78 | 211 | 226 |
| UH6  | N  | 1 | 24.84 | 21.84 | 6.81  | 4.48  | 88  | 96  |
|      | T1 |   | 13.06 | 9.98  | 9.00  | 6.09  | 119 | 125 |
|      | T2 |   | 18.04 | 14.74 | 12.59 | 9.08  | 178 | 194 |
| UH8  | N  | 1 | 9.16  | 8.87  | 8.00  | 5.83  | 114 | 114 |
|      | T1 |   | 13.80 | 13.13 | 11.68 | 7.97  | 156 | 156 |
|      | T2 |   | 10.07 | 9.59  | 8.61  | 5.92  | 116 | 115 |
| UH11 | N  | 1 | 7.32  | 6.92  | 6.37  | 4.33  | 85  | 86  |
|      | T1 |   | 8.09  | 7.60  | 7.17  | 4.87  | 96  | 94  |
|      | T2 |   | 7.51  | 7.15  | 6.78  | 4.68  | 92  | 90  |

For each sample, sequenced, aligned, aligned after removal of PCR duplicates, and on target Giga base pairs (Gbps) are provided. The mean depth of coverage considering on target reads across the all exome and on cancer genes is also provided.

**Supplementary Table 3.** Quality controls on variant calling

| Patient ID | Lesion | Sequencing round | VarScan | $\geq 10x$ , freq $>5\%$ , $>1\%$ on both strands | Confirmed in the other | Round overlap (%) | Union  | Somatic SNVs/InDels | Somatic SNVs | SNVs confirmed with MuTect (%) | Somatic InDels | Confirmed with Strelka (%) |
|------------|--------|------------------|---------|---------------------------------------------------|------------------------|-------------------|--------|---------------------|--------------|--------------------------------|----------------|----------------------------|
| S13        | T1     | 1                | 785,500 | 42,657                                            | 38,268                 | 90%               | 43,466 | 1,143               | 928          | 93%                            | 215            | 74%                        |
|            | T1     | 2                | 438,492 | 50,055                                            | 42,836                 | 86%               |        |                     |              |                                |                |                            |
|            | T2     | 1                | 409,217 | 48,714                                            | 42,245                 | 87%               | 43,861 | 1,659               | 1,153        | 95%                            | 506            | 69%                        |
|            | T2     | 2                | 447,745 | 49,338                                            | 42,510                 | 86%               |        |                     |              |                                |                |                            |
| S6         | T1     | 1                | 615,615 | 45,314                                            | 40,117                 | 89%               | 55,495 | 2,891               | 1,842        | 99%                            | 1,049          | 100%                       |
|            | T1     | 2                | 585,487 | 29,800                                            | 27,028                 | 91%               |        |                     |              |                                |                |                            |
|            | T2     | 1                | 718,121 | 44,431                                            | 38,489                 | 87%               | 49,606 | 1,056               | 949          | 98%                            | 107            | 100%                       |
|            | T2     | 2                | 820,005 | 22,345                                            | 19,997                 | 89%               |        |                     |              |                                |                |                            |
| S3         | T1     | 1                | 211,346 | 45,314                                            | 40,117                 | 89%               | 40,439 | 101                 | 99           | 91%                            | 2              | 74%                        |
|            | T1     | 2                | 396,122 | 29,800                                            | 27,028                 | 91%               |        |                     |              |                                |                |                            |
|            | T2     | 1                | 352,704 | 44,431                                            | 38,489                 | 87%               | 38,711 | 102                 | 101          | 89%                            | 1              | 67%                        |
|            | T2     | 2                | 315,877 | 22,345                                            | 19,997                 | 89%               |        |                     |              |                                |                |                            |
| S12        | T1     | 1                | 601,073 | 41,003                                            | 21,682                 | 53%               | 21,840 | 158                 | 158          | 89%                            | 0              | 100%                       |
|            | T1     | 2                | 114,876 | 5,754                                             | 4,287                  | 75%               |        |                     |              |                                |                |                            |
|            | T2     | 1                | 620,773 | 42,268                                            | 17,334                 | 41%               | 17,427 | 121                 | 116          | 88%                            | 5              | 80%                        |
|            | T2     | 2                | 82,795  | 3,565                                             | 2,554                  | 72%               |        |                     |              |                                |                |                            |
| UH1        | T1     | 1                | 886,994 | 42,996                                            | -                      | -                 | -      | 2,740               | 1,654        | 94%                            | 1,086          | 61%                        |
|            | T2     | 1                | 818,666 | 37,652                                            | -                      | -                 | -      | 63                  | 60           | 90%                            | 3              | 33%                        |
| UH2        | T1     | 1                | 783,515 | 41,885                                            | -                      | -                 | -      | 1,739               | 1,174        | 94%                            | 565            | 78%                        |
|            | T2     | 1                | 817,796 | 37,146                                            | -                      | -                 | -      | 531                 | 469          | 76%                            | 62             | 89%                        |
| UH5        | T1     | 1                | 755,797 | 43,040                                            | -                      | -                 | -      | 1,154               | 840          | 89%                            | 314            | 90%                        |
|            | T2     | 1                | 463,864 | 44,133                                            | -                      | -                 | -      | 251                 | 242          | 55%                            | 9              | 56%                        |
| UH6        | T1     | 1                | 542,675 | 41,813                                            | -                      | -                 | -      | 51                  | 49           | 73%                            | 2              | 100%                       |
|            | T2     | 1                | 690,682 | 42,479                                            | -                      | -                 | -      | 136                 | 130          | 90%                            | 6              | 100%                       |
| UH8        | T1     | 1                | 566,248 | 40,930                                            | -                      | -                 | -      | 103                 | 98           | 85%                            | 5              | 80%                        |
|            | T2     | 1                | 605,477 | 38,751                                            | -                      | -                 | -      | 84                  | 80           | 83%                            | 4              | 50%                        |
| UH11       | T1     | 1                | 890,739 | 46,823                                            | -                      | -                 | -      | 985                 | 720          | 87%                            | 265            | 80%                        |

|  |    |   |         |        |   |   |   |       |       |     |     |     |
|--|----|---|---------|--------|---|---|---|-------|-------|-----|-----|-----|
|  | T2 | 1 | 795,024 | 49,214 | - | - | - | 2,164 | 1,468 | 93% | 696 | 73% |
|--|----|---|---------|--------|---|---|---|-------|-------|-----|-----|-----|

For each tumour, reported are the number of mutations at each step of the variant calling pipeline, as described in Supplementary Fig. 3. Tumors of patients S13, S6, S3 and S12 underwent two rounds of sequencing and the overlap between the two rounds is shown. The second round of S12T1 and S12T2 had lower coverage (Supplementary Fig. 2) and therefore the overlap is lower. Finally, the percentage of somatic SNVs and InDels that were confirmed with MuTect and Strelka are also reported.

**Supplementary Table 4.** Sequencing statistics for deep sequencing of a cancer gene panel in 6 tumour samples

| <b>Patient ID</b> | <b>Sample Type</b> | <b>Sequenced Gbps</b> | <b>Aligned Gbps</b> | <b>Gbps after removal of duplicates</b> | <b>On Target Gbps</b> | <b>Mean coverage (reads)</b> |
|-------------------|--------------------|-----------------------|---------------------|-----------------------------------------|-----------------------|------------------------------|
| UH1               | T1                 | 1.95                  | 1.03                | 0.58                                    | 0.21                  | 265                          |
|                   | T2                 | 1.94                  | 0.54                | 0.27                                    | 0.09                  | 115                          |
| UH2               | T1                 | 1.92                  | 0.72                | 0.37                                    | 0.12                  | 157                          |
|                   | T2                 | 1.95                  | 1.73                | 0.73                                    | 0.24                  | 307                          |
| UH11              | T1                 | 1.27                  | 1.18                | 0.73                                    | 0.26                  | 335                          |
|                   | T2                 | 1.99                  | 1.86                | 1.06                                    | 0.40                  | 505                          |

For each sample, sequenced, aligned, aligned after removal of PCR duplicates, and on target Giga base pairs (Gbps) are provided. The mean depth of coverage considering on target reads on 151 cancer genes is provided.



**Supplementary Table 5.** Results of the Sanger sequencing validation

| Coordinate (Hg19) | Ref | Var    | Gene        | Mutation type        | SNP ID (dbSNP138) | Mutated sample (ID) | Forward primer sequence | Reverse primer sequence | Amplicon size (bp) | Confirmed |
|-------------------|-----|--------|-------------|----------------------|-------------------|---------------------|-------------------------|-------------------------|--------------------|-----------|
| 2:148683685       | T   | -A     | ACVR2A      | frameshift deletion  | -                 | UH1T1               | GAGGAAATTGGCCAGCATCC    | TGCAGAAGAAAGAGAAATGTGC  | 190                | TRUE      |
| 5:112128191       | C   | T      | APC         | Stopgain             | -                 | UH8T1               | CCTGAGCTTTTAAGTGGTAGCC  | GCTTCTGTTGCTTGGGACTG    | 171                | TRUE      |
| 5:112175754       | T   | -A     | APC         | frameshift deletion  | -                 | UH8T1               | CATGCCACCAAGCAGAAGTA    | CACTCAGGCTGGATGAACAA    | 233                | TRUE      |
| 5:112175303       | C   | T      | APC         | Stopgain             | -                 | S3T2                | CTGCCACTTGCAAAGTTTCT    | AAACATGAGTGGGGTCTCCT    | 416                | TRUE      |
| 5:112175215       | A   | +A     | APC         | frameshift insertion | -                 | S3T1                | CCATTCCTACAGAAGGCAGA    | TGAGGTGAATCAAAAGCAAA    | 466                | TRUE      |
| 5:112154724       | G   | A      | APC1        | nonsynonymous        | rs377665107       | UH1T1               | AAACTCATTTGGCCACAGG     | GCTGGATGAGGAGAGGAAGA    | 161                | TRUE      |
| 5:112175211       | T   | -AAAAG | APC2        | frameshift deletion  | -                 | UH1T2               | ATCAGACGACACAGGAAGCA    | TGCCTGGCTGATTCTGAAGA    | 178                | TRUE      |
| 5:112176026       | A   | -T     | APC3        | frameshift deletion  | -                 | UH5T2               | ACCAAGAGAAAGAGGCAGAAA   | GTACACAGGCAGCTGACTTG    | 203                | FALSE     |
| 1:27105930        | T   | +G     | ARID1A      | frameshift insertion | rs1057192         | UH6T1               | GTGCAGGAGTTTGACAGTGG    | TCTGTTGTCCCTGGTGTACC    | 179                | FALSE     |
| 20:31657760       | C   | T      | BPIFB3      | nonsynonymous        | -                 | UH6T2               | ACAGATGGATGGAGGCAGAC    | GATGCTCAAGAAACGGGAGG    | 238                | TRUE      |
| 11:119170274      | G   | A      | CBL         | nonsynonymous        | -                 | UH8T2               | AGAGGCCTCCAAAACCATTC    | GGCCATCTCGATGTTGTTCT    | 203                | TRUE      |
| 16:15131330       | G   | A      | CCDC105     | nonsynonymous        | rs35352238        | UH6T1               | ACTCTGTCTTCTCCTCCCT     | GTCTGGAGGAGGCGTTTTCT    | 207                | FALSE     |
| 3:41266124        | A   | G      | CTNNB1      | nonsynonymous        | rs121913412       | UH11T2              | ATGGAGTTGGACATGGCCAT    | TCCACATCCTCTCCTCAGG     | 152                | TRUE      |
| 21:38858865       | C   | T      | DYRK1A      | Stopgain             | -                 | UH2T1               | GGCATATGATCGTGTGGAGC    | AAGTTTTGGTGTGGGTGGG     | 190                | TRUE      |
| 6:116783330       | G   | A      | FAM26F      | nonsynonymous        | -                 | UH6T1               | GCCTGGTCTTCTTGCTGGT     | CACTCGTAAAAGGCGCCC      | 223                | TRUE      |
| 4:153244092       | G   | A      | FBXW7       | nonsynonymous        | -                 | UH5T1               | GGGCAGGGAGTATATCGTCT    | AGTCACATTGGAGAGTGGGG    | 197                | TRUE      |
| 2:216274342       | G   | A      | FN1         | nonsynonymous        | -                 | UH8T2               | CATCTCCCTCCTCACTCAGC    | TAAAATGATGTTGGCGACGA    | 240                | TRUE      |
| 22:36889782       | C   | A      | FOXRED2     | stopgain             | -                 | UH5T1               | TGGGAGCTTAAGTTACCTGCA,  | CTCTCCTCCCCACAGAACAG    | 202                | TRUE      |
| 7:151845523       | T   | -A     | MLL3        | frameshift deletion  | -                 | UH11T1              | TAGCAATCTGTGCGACCTCA    | TGCCACAGATTTGATGCAC     | 190                | TRUE      |
| 2:48028135        | C   | T      | MSH6        | stopgain             | rs63750563        | UH1T1               | GTAGGAACCGTTACCAGC      | TCCCTCCGTTCTTCAGCATT    | 160                | TRUE      |
| 2:211179765       | A   | -T     | MYL1        | frameshift           | -                 | UH5T2               | CTTCTTTGGGTTTGGCTGGG    | ACCACCCTCCTCTCCAAG      | 192                | TRUE      |
| 12:57114417       | T   | +G     | NACA        | frameshift insertion | -                 | UH1T1               | GCAAGATGAGAGCCCAGAGA    | ATCGCTTCCCTCAAGTCAA     | 209                | TRUE      |
| 7:150693568       | G   | -C     | NOS3        | frameshift deletion  | -                 | UH11T2              | CTGTCTGACCTTTGCACTC     | CGGGAAGCTGTCACCTCTTA    | 194                | TRUE      |
| 5:102260714       | C   | T      | PAM         | nonsynonymous        | -                 | UH5T2               | CCCATCACCTCCACCATG      | AGCTGAACATAAGACCACCCA   | 204                | TRUE      |
| 12:133233939      | T   | C      | POLE        | nonsynonymous        | -                 | UH11T2              | ACCCATCAGAGAGACCCT      | CTGTTCTCTGTGCCGTTTC     | 188                | TRUE      |
| 9:33798075        | T   | C      | PRSS3;PRSS3 | nonsynonymous        | -                 | S13T2               | CTCACCTGCCGTCATCAATG    | GGCATGCTTCGTTCTGGAAA    | 177                | TRUE      |
| 18:48573591       | A   | G      | SMAD4       | nonsynonymous        | -                 | UH1T1               | ACCCAAGACAGAGCATCAAAG   | TAAGGTTAAGGGCCCCAACG    | 152                | TRUE      |

|             |   |    |       |                     |             |       |                        |                      |     |      |
|-------------|---|----|-------|---------------------|-------------|-------|------------------------|----------------------|-----|------|
| 18:48604835 | T | C  | SMAD4 | stoploss            | -           | UH2T1 | AGACAAGGTGGAGAGAGTGA   | TGAAGCCTCCCATCCAATGT | 170 | TRUE |
| 18:48591919 | G | A  | SMAD4 | nonsynonymous       | rs377767347 | UH5T1 | GCTCCTGAGTATTGGTGTTC   | ACCTTGCTCTCTCAATGGCT | 187 | TRUE |
| 17:7578457  | C | T  | TP53  | nonsynonymous       | -           | UH8T1 | CTCCGTCATGTGCTGTGACT   | GTTTCTTTGCTGCCGTCTTC | 221 | TRUE |
| 17:7578433  | G | C  | TP53  | stopgain            | -           | S12T1 | CCCAGTTGCAAACCAGAC     | CACTTGTGCCCTGACTTTC  | 442 | TRUE |
| 6:139581469 | G | A  | TXLNB | stopgain            | -           | UH2T2 | ACAACCTTGCTCAGAGTGTCTC | CAGAAGCTGGTGGATGCAAA | 153 | TRUE |
| 8:103283450 | G | A  | UBR5  | stopgain            | -           | UH6T2 | CTGCTCGCAAACCACTACTC   | ACACAGATGCTAGGGAAGGA | 227 | TRUE |
| 17:5036224  | C | G  | USP6  | nonsynonymous       | -           | S13T1 | AGAGCCCAAGACTCAGCATC   | GCCTCTCCCTCCACACATTA | 181 | TRUE |
| 4:1980558   | G | -C | WHSC1 | frameshift deletion | -           | UH1T1 | TTCATTTTGCCACCTCTGCC   | TTTGCCCTCTGTGACTCTCC | 217 | TRUE |

For each of the 35 mutations, genomic coordinates, reference allele (Ref), variant allele (Var), gene symbol, type of mutation, SNP identifier, mutated sample identifier, sequence of PCR primers, amplicon size and validation result are reported.

## Supplementary Note 1

To compare the clone composition of paired tumours, we classified them as monoclonal, biclonal and polyclonal based on the clonality of their somatic alterations, measured as described in Fig. 2a and Methods. In each tumour, we counted how many alterations (SNVs, InDels, amplifications and deletions) had clonality  $>80\%$ ;  $35\%-80\%$ ; and  $<35\%$  and identified the largest group of the three. On average the largest group accounted for 64% of all somatic alterations of a tumour (Fig. 2b).

The two thresholds of clonality (80% and 35%) that were used to define the three groups allowed the identification of three well distinct scenarios:

- If alterations with clonality  $>80\%$  were the largest group, the majority of cells shared the same (almost clonal) alterations and the tumour could be considered as mostly composed of a dominant clone (*i.e.* monoclonal);
- If alterations with  $<35\%$  clonality were the largest group, the tumour could be considered as polyclonal because multiple clones co-existed and contributed with a similar share to the tumour mass (for example there were at least three clones each accounting for  $\sim 33\%$  of the mass);
- In the intermediate situation where alterations with  $35\% < \text{clonality} < 80\%$  were the largest group, the tumour could be considered as biclonal because this range of frequency is compatible with two main clones forming the tumour mass.

It should be noted that the density distributions that are used to infer the peaks of clonality provide only an estimation of the expected number of mutations at each clonality.

## Supplementary References

1. Alexandrov LB, *et al.* Signatures of mutational processes in human cancer. *Nature* **500**, 415-421 (2013).
2. Rahbari R, *et al.* Timing, rates and spectra of human germline mutation. *Nat Genet*, (2015).
3. McGranahan N, Favero F, de Bruin EC, Birkbak NJ, Szallasi Z, Swanton C. Clonal status of actionable driver events and the timing of mutational processes in cancer evolution. *Sci Transl Med* **7**, 283ra254 (2015).
